# Supplementary material for: Cyclic diguanylate monophosphate directly binds to human siderocalin and inhibits its antibacterial activity
Source: PubMed Central journal article supplement (PMC4595737; doi:10.1038/ncomms9330), 2015-09-22
Supplement: ncomms9330-s1.pdf [file ncomms9330-s1.pdf]

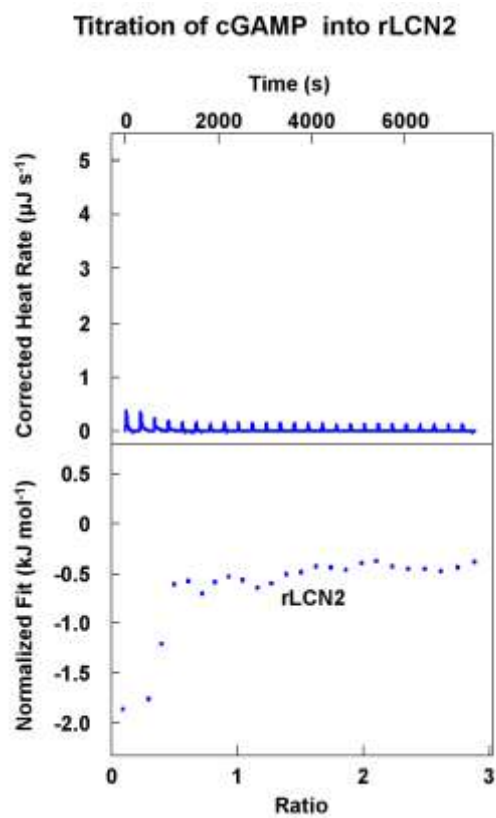

**Supplementary Figure 1. ITC assay for the interaction between cGAMP and rLCN2.** Original titration data and integrated heat measurements are shown in the upper and lower plots, respectively.

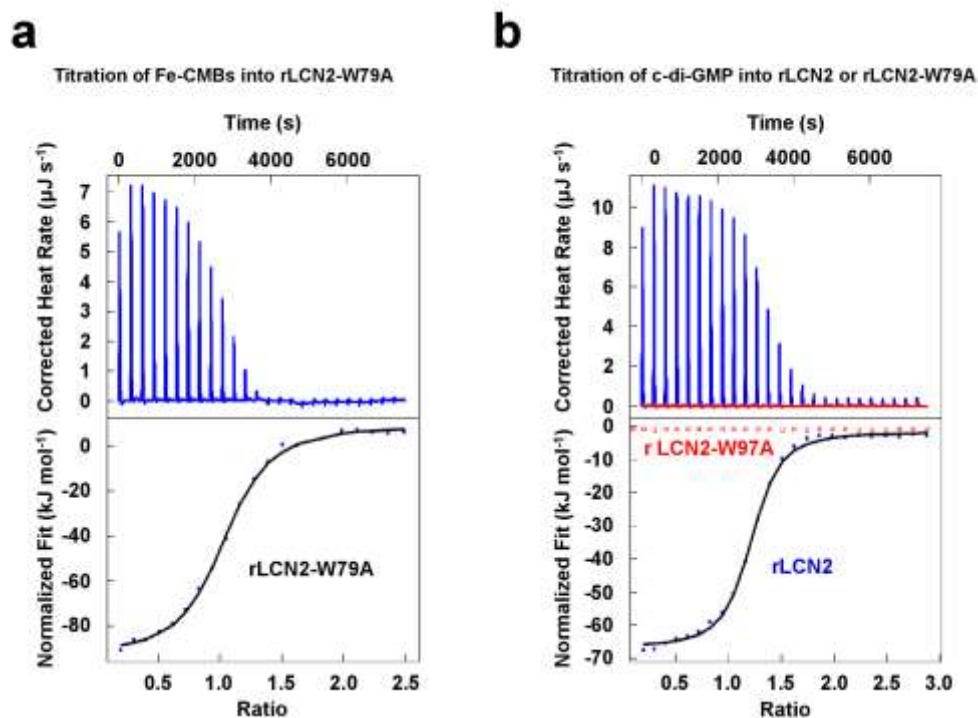

**Supplementary Figure 2. ITC assays for the interaction between the mutant protein rLCN2-W79A and Fe-CMBs or c-di-GMP. (a)** The interaction between Fe-CMBs and rLCN2-W79A protein. **(b)** The interaction between c-di-GMP and rLCN2 /rLCN2-W79A protein. Original titration data and integrated heat measurements are shown in the upper and lower plots, respectively. Blue and red indicate data for rLCN2 and rLCN2-W79A, respectively.

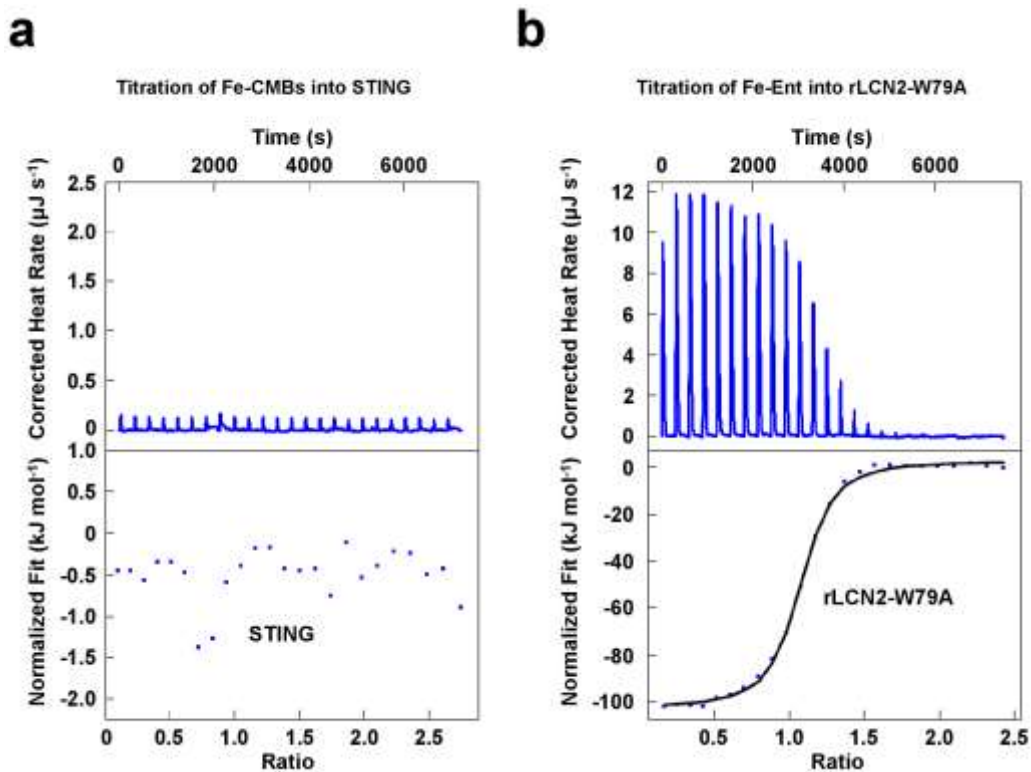

**Supplementary Figure 3. ITC assays for the interaction between ferric siderophores and STING or the mutant protein rLCN2-W79A. (a)** The interaction between Fe-CMBs and STING protein. **(b)** The interaction between Fe-Ent and rLCN2-W79A protein. Original titration data and integrated heat measurements are shown in the upper and lower plots, respectively.

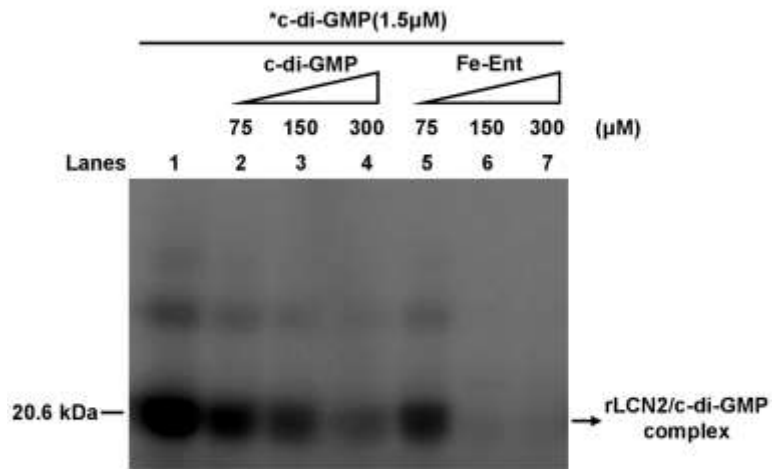

**Supplementary Figure 4. Cross-linking assay for the ability of c-di-<sup>32</sup>P]GMP to bind to rLCN2 with Fe-Ent.** Competitive experiments were carried out by addition 75-300 μM of unlabeled c-di-GMP (lanes 2 to 4) or Fe-Ent (lanes 5 to 7) to the reaction mixtures containing 15 μM rLCN2 and 1.5 μM c-di-<sup>32</sup>P]GMP (lanes 2 to 4). The reaction samples were assayed on a 12% w/v SDS-PAGE.

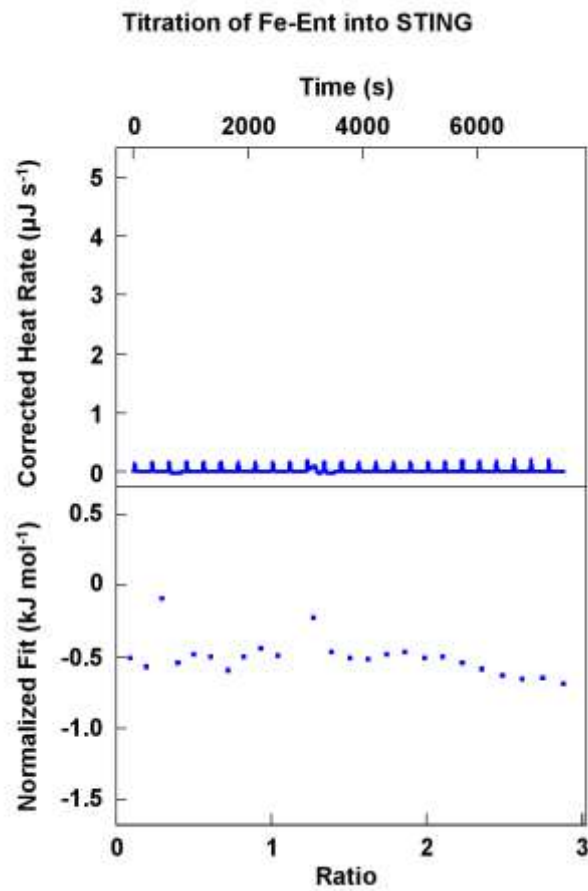

**Supplementary Figure 5. ITC assay for the interaction between Fe-Ent and STING.** Original titration data and integrated heat measurements are shown in the upper and lower plots, respectively.

**Supplementary Table 1. Thermodynamic parameters measured by ITC at 25 °C**

|          | LCN2                               |                                    |                                                   |             | LCN2-W97A                          |                                    |                                                   |             |
|----------|------------------------------------|------------------------------------|---------------------------------------------------|-------------|------------------------------------|------------------------------------|---------------------------------------------------|-------------|
|          | $\Delta G$<br>kJ mol <sup>-1</sup> | $\Delta H$<br>kJ mol <sup>-1</sup> | $\Delta S$<br>J mol <sup>-1</sup> K <sup>-1</sup> | $n$         | $\Delta G$<br>kJ mol <sup>-1</sup> | $\Delta H$<br>kJ mol <sup>-1</sup> | $\Delta S$<br>J mol <sup>-1</sup> K <sup>-1</sup> | $n$         |
| Fe-CMBs  | -27.81±1.05                        | -91.77±2.26                        | -214.5±3.15                                       | 1.079 ±0.04 | -30.81±2.05                        | -102.19±3.12                       | -239.4±3.04                                       | 0.996 ±0.04 |
| Fe-Ent   | -31.8±1.89                         | -106.67±2.62                       | -251.1±3.22                                       | 1.039 ±0.01 | -30.9±1.14                         | -105.5±4.94                        | -250.2±3.11                                       | 1.041±0.01  |
| c-di-GMP | -31.16±1.52                        | -65.39 ±1.36                       | -114.8 ±2.05                                      | 1.045±0.01  | /                                  | /                                  | /                                                 | /           |
